# Supplementary material for: Social Frailty Index: Development and validation of an index of social attributes predictive of mortality in older adults
Source: PubMed Central journal article supplement — Proc Natl Acad Sci U S A. 2023 Feb 7;120(7):e2209414120. doi: 10.1073/pnas.2209414120 (PMC9963593; doi:10.1073/pnas.2209414120), 2023-02-07
Supplement: pnas.2209414120.sapp.pdf [file pnas.2209414120.sapp.pdf]

## Appendix 1: Candidate social predictors

| STEM                                                                                                                             | QUESTION                                                                                                                                                                                                    | DOMAIN            |
|----------------------------------------------------------------------------------------------------------------------------------|-------------------------------------------------------------------------------------------------------------------------------------------------------------------------------------------------------------|-------------------|
| These questions ask how you feel about your local area, that is everywhere within a 20 minute walk or about a mile of your home. | I really feel part of this area/I feel that I don't belong in this area                                                                                                                                     | General Resources |
|                                                                                                                                  | There is no problem with vandalism and graffiti in this area/Vandalism and graffiti are a big problem in this area                                                                                          | General Resources |
|                                                                                                                                  | Most people in this area can be trusted/Most people in this area can't be trusted                                                                                                                           | General Resources |
|                                                                                                                                  | People feel safe walking alone in this area after dark/People would be afraid to walk alone in this area after dark                                                                                         | General Resources |
|                                                                                                                                  | Most people in this area are friendly/Most people in this area are unfriendly                                                                                                                               | General Resources |
|                                                                                                                                  | This area is kept very clean/This area is always full of rubbish and litter                                                                                                                                 | General Resources |
|                                                                                                                                  | If you were in trouble, there are lots of people in this area who would help you/If you were in trouble, there is nobody in this area who would help you                                                    | General Resources |
|                                                                                                                                  | There are no vacant houses or storefronts in this area/There are many vacant or deserted houses or storefronts in this area                                                                                 | General Resources |
|                                                                                                                                  | Using a 0 to 10 scale where 0 means "no control at all" and 10 means "very much control," how would you rate the amount of control you have over your financial situation these days? (Mark (X) one number) | General Resources |
|                                                                                                                                  | Has the amount of control you have over your financial situation changed in the last year?                                                                                                                  | General Resources |
| For each of the following events, please indicate whether the event occurred AT ANY POINT IN YOUR LIFE.                          | Have you ever been homeless or lived in a shelter?                                                                                                                                                          | General Resources |
|                                                                                                                                  | Have you ever been an inmate in a jail, prison, juvenile detention center, or\ other correctional facility?                                                                                                 | General Resources |
|                                                                                                                                  | At any time in your life, have you ever been unfairly dismissed from a job? If yes, what year?                                                                                                              | General Resources |
|                                                                                                                                  | For unfair reasons, have you ever not been hired for a job? If yes, what year?                                                                                                                              | General Resources |
|                                                                                                                                  | Have you ever been unfairly denied a promotion? If yes, what year?                                                                                                                                          | General Resources |
|                                                                                                                                  | Have you ever been unfairly prevented from moving into a neighborhood because the landlord or a realtor refused to sell or rent you a house or apartment? If yes, what year?                                | General Resources |
|                                                                                                                                  | Have you ever been unfairly denied a bank loan? If yes, what year?                                                                                                                                          | General Resources |
|                                                                                                                                  | Have you ever been unfairly stopped, searched, questioned, physically threatened or abused by the police? If yes, what year?                                                                                | General Resources |
|                                                                                                                                  | Have you ever been unfairly denied health care or treatment? If yes, what year?                                                                                                                             | General Resources |

| STEM                                                                                                                                                                                  | QUESTION                                                                                                                              | DOMAIN                            |
|---------------------------------------------------------------------------------------------------------------------------------------------------------------------------------------|---------------------------------------------------------------------------------------------------------------------------------------|-----------------------------------|
|                                                                                                                                                                                       | Has a child of yours ever died? If yes, what year?                                                                                    | General Resources                 |
|                                                                                                                                                                                       | Have you ever been in a major fire, flood, earthquake, or other natural disaster? If yes, what year?                                  | General Resources                 |
|                                                                                                                                                                                       | Have you ever fired a weapon in combat or been fired upon in combat? If yes, what year?                                               | General Resources                 |
|                                                                                                                                                                                       | Has your spouse, partner, or child ever been addicted to drugs or alcohol? If yes, what year?                                         | General Resources                 |
|                                                                                                                                                                                       | Were you the victim of a serious physical attack or assault? If yes, what year?                                                       | General Resources                 |
|                                                                                                                                                                                       | Did you ever have a life-threatening illness or accident? If yes, what year?                                                          | General Resources                 |
|                                                                                                                                                                                       | Did your spouse or a child of yours ever have a life-threatening illness or accident? If yes, what year?                              | General Resources                 |
| For this next set of events, please think about your childhood growing up, BEFORE YOU WERE 18 YEARS OLD                                                                               | Before you were 18 years old, did you have to do a year of school over again?                                                         | General Resources                 |
|                                                                                                                                                                                       | Before you were 18 years old, were you ever in trouble with the police?                                                               | General Resources                 |
|                                                                                                                                                                                       | Before you were 18 years old, did either of your parents drink or use drugs so often that it caused problems in the family?           | General Resources                 |
|                                                                                                                                                                                       | Before you were 18 years old, were you ever physically abused by either of your parents?                                              | Fulfillment of Basic Social Needs |
| Now please think about the LAST 5 YEARS and indicate whether each of the events below occurred. If the event did happen, please indicate the year in which it happened MOST RECENTLY. | Have you involuntarily lost a job for reasons other than retirement at any point in the past five years? If yes, what year?           | General Resources                 |
|                                                                                                                                                                                       | Have you been unemployed and looking for work for longer than 3 months at some point in the past five years? If yes, what year?       | General Resources                 |
|                                                                                                                                                                                       | Was anyone else in your household unemployed and looking for work for longer than 3 months in the past five years? If yes, what year? | General Resources                 |
|                                                                                                                                                                                       | Have you moved to a worse residence or neighborhood in the past five years? If yes, what year?                                        | General Resources                 |
|                                                                                                                                                                                       | Were you robbed or did you have your home burglarized in the past five years? If yes, what year?                                      | General Resources                 |
|                                                                                                                                                                                       | Have you been the victim of fraud in the past five years? If yes, what year?                                                          | General Resources                 |
| Please think about your life and situation RIGHT NOW. HOW SATISFIED ARE YOU WITH...                                                                                                   | The condition of the place where you live (house or apartment)?                                                                       | General Resources                 |
|                                                                                                                                                                                       | The city or town you live in?                                                                                                         | General Resources                 |
|                                                                                                                                                                                       | Your daily life and leisure activities?                                                                                               | General Resources                 |
|                                                                                                                                                                                       | Your family life?                                                                                                                     | Social Resources                  |
|                                                                                                                                                                                       | Your present financial situation?                                                                                                     | General Resources                 |

| STEM                                                                                                               | QUESTION                                                                                                                                                                                                                                                                                                                                                                                                                                                                                               | DOMAIN            |
|--------------------------------------------------------------------------------------------------------------------|--------------------------------------------------------------------------------------------------------------------------------------------------------------------------------------------------------------------------------------------------------------------------------------------------------------------------------------------------------------------------------------------------------------------------------------------------------------------------------------------------------|-------------------|
|                                                                                                                    | The total income of your household?                                                                                                                                                                                                                                                                                                                                                                                                                                                                    | General Resources |
|                                                                                                                    | Are you currently working?                                                                                                                                                                                                                                                                                                                                                                                                                                                                             | General resources |
| Right now, would you like to leave work altogether, but plan to keep working because...                            | You need money                                                                                                                                                                                                                                                                                                                                                                                                                                                                                         | General resources |
|                                                                                                                    | You need health insurance                                                                                                                                                                                                                                                                                                                                                                                                                                                                              | General resources |
| Please use the scale below to answer the next set of questions. (Mark (X) one box for each line.)                  | My home life keeps me from getting work done on time on my job.                                                                                                                                                                                                                                                                                                                                                                                                                                        | General resources |
|                                                                                                                    | My work leaves me enough time to attend to my personal responsibilities.                                                                                                                                                                                                                                                                                                                                                                                                                               | General resources |
| Please say how much you agree or disagree with each of the following statements. (Mark (X) one box for each line.) | All things considered, I am satisfied with my job.                                                                                                                                                                                                                                                                                                                                                                                                                                                     | General resources |
|                                                                                                                    | My job is physically demanding.                                                                                                                                                                                                                                                                                                                                                                                                                                                                        | General resources |
|                                                                                                                    | My job promotion prospects are poor.                                                                                                                                                                                                                                                                                                                                                                                                                                                                   | General resources |
|                                                                                                                    | My job security is poor.                                                                                                                                                                                                                                                                                                                                                                                                                                                                               | General resources |
|                                                                                                                    | I have the opportunity to develop new skills.                                                                                                                                                                                                                                                                                                                                                                                                                                                          | General resources |
|                                                                                                                    | The demands of my job interfere with my personal life.                                                                                                                                                                                                                                                                                                                                                                                                                                                 | General resources |
|                                                                                                                    | The people I work with can be relied on when I need help                                                                                                                                                                                                                                                                                                                                                                                                                                               | Social Resources  |
|                                                                                                                    | How difficult is it for (you/your family) to meet monthly payments on (your/your family's) bills?                                                                                                                                                                                                                                                                                                                                                                                                      | General Resources |
|                                                                                                                    | Race                                                                                                                                                                                                                                                                                                                                                                                                                                                                                                   | General Resources |
|                                                                                                                    | Whether Hispanic                                                                                                                                                                                                                                                                                                                                                                                                                                                                                       | General Resources |
|                                                                                                                    | Educational attainment                                                                                                                                                                                                                                                                                                                                                                                                                                                                                 | General Resources |
|                                                                                                                    | Receives social security                                                                                                                                                                                                                                                                                                                                                                                                                                                                               | General resources |
|                                                                                                                    | currently receiving pension income                                                                                                                                                                                                                                                                                                                                                                                                                                                                     | General Resources |
|                                                                                                                    | Covered by federal gov health insurance                                                                                                                                                                                                                                                                                                                                                                                                                                                                | General Resources |
|                                                                                                                    | covered by current or previous employer                                                                                                                                                                                                                                                                                                                                                                                                                                                                | General Resources |
|                                                                                                                    | labor force status                                                                                                                                                                                                                                                                                                                                                                                                                                                                                     | General resources |
|                                                                                                                    | current job requires physical effort                                                                                                                                                                                                                                                                                                                                                                                                                                                                   | General resources |
|                                                                                                                    | current job involves lots of stress                                                                                                                                                                                                                                                                                                                                                                                                                                                                    | General resources |
|                                                                                                                    | Think of this ladder as representing where people stand in our society. At the top of the ladder are the people who are the best off - those who have the most money, most education, and best jobs. At the bottom are the people who are the worst off - who have the least money, least education, and the worst jobs or no jobs. The higher up you are on this ladder, the closer you are to the people at the very top and the lower you are, the closer you are to the people at the very bottom. | General Resources |

| STEM                                                                                                                                                                                                                                                                              | QUESTION                                                                                                         | DOMAIN                            |
|-----------------------------------------------------------------------------------------------------------------------------------------------------------------------------------------------------------------------------------------------------------------------------------|------------------------------------------------------------------------------------------------------------------|-----------------------------------|
|                                                                                                                                                                                                                                                                                   | Has your position on the ladder changed within the last two years?                                               | General Resources                 |
| Please read the list below and indicate whether or not any of these are current and ongoing problems that have lasted twelve months or longer. If the problem is happening to you, indicate how upsetting it has been. Check the answer that is most like your current situation. | Ongoing physical or emotional problems (in spouse or child)                                                      | Fulfillment of Basic Social Needs |
|                                                                                                                                                                                                                                                                                   | Ongoing problems with alcohol or drug use in family member                                                       | Social Resources                  |
|                                                                                                                                                                                                                                                                                   | Ongoing difficulties at work                                                                                     | Social Behavior and Activities    |
|                                                                                                                                                                                                                                                                                   | Ongoing financial strain                                                                                         | General Resources                 |
|                                                                                                                                                                                                                                                                                   | Ongoing housing problems                                                                                         | General Resources                 |
|                                                                                                                                                                                                                                                                                   | Ongoing problems in a close relationship                                                                         | Fulfillment of Basic Social Needs |
|                                                                                                                                                                                                                                                                                   | Helping at least one sick, limited, or frail family member or friend on a regular basis                          | General Resources                 |
|                                                                                                                                                                                                                                                                                   | Total Wealth (Including Secondary Residence)                                                                     | General Resources                 |
|                                                                                                                                                                                                                                                                                   | Change in wealth                                                                                                 | General Resources                 |
|                                                                                                                                                                                                                                                                                   | Do you have a husband, wife, or partner with whom you live?                                                      | Social Resources                  |
|                                                                                                                                                                                                                                                                                   | Do you have any living children?                                                                                 | Social resources                  |
|                                                                                                                                                                                                                                                                                   | How many of your children would you say you have a close relationship with?                                      | Social Resources                  |
|                                                                                                                                                                                                                                                                                   | Do you have any OTHER IMMEDIATE FAMILY, for example, any brothers or sisters, parents, cousins or grandchildren? | Social Resources                  |
| The next statements are about people's relationships with their parents early in life (before age 18). Please tell us how much you agree or disagree with each statement for you personally. (Mark (X) one box for each line.)                                                    | I had a good relationship with my mother before age 18.                                                          | Social Resources                  |
|                                                                                                                                                                                                                                                                                   | I had a good relationship with my father before age 18.                                                          | Social Resources                  |
|                                                                                                                                                                                                                                                                                   | Couple household?                                                                                                | Social Resources                  |
|                                                                                                                                                                                                                                                                                   | Marital Status                                                                                                   | Social Resources                  |
|                                                                                                                                                                                                                                                                                   | Mother alive                                                                                                     | Social Resources                  |
|                                                                                                                                                                                                                                                                                   | Father alive                                                                                                     | Social Resources                  |
|                                                                                                                                                                                                                                                                                   | Number of people in household                                                                                    | Social Resources                  |
|                                                                                                                                                                                                                                                                                   | Number of children                                                                                               | Social Resources                  |
|                                                                                                                                                                                                                                                                                   | Number of living siblings                                                                                        | Social Resources                  |
|                                                                                                                                                                                                                                                                                   | How many of these family members would you say you have a close relationship with?                               | Social Resources                  |
|                                                                                                                                                                                                                                                                                   | Do you have any friends?                                                                                         | Social Resources                  |
|                                                                                                                                                                                                                                                                                   | How many of your friends would you say you have a close relationship with?                                       | Social Resources                  |

| <b>STEM</b>                                                                                                                 | <b>QUESTION</b>                                                                                         | <b>DOMAIN</b>                     |
|-----------------------------------------------------------------------------------------------------------------------------|---------------------------------------------------------------------------------------------------------|-----------------------------------|
| HOW OFTEN YOU DO EACH ACTIVITY.                                                                                             | Care for a sick or disabled adult?                                                                      | Social Behavior and Activities    |
|                                                                                                                             | Do activities with grandchildren, nieces/nephews, or neighborhood children?                             | Social Behavior and Activities    |
|                                                                                                                             | Do volunteer work with children or young people?                                                        | Social Behavior and Activities    |
|                                                                                                                             | Do any other volunteer or charity work?                                                                 | Social Behavior and Activities    |
|                                                                                                                             | Go to a sport, social, or other club?                                                                   | Social Behavior and Activities    |
|                                                                                                                             | Attend meetings of non-religious organizations, such as political, community, or other interest groups? | Social Behavior and Activities    |
| On average, how often do you do each of the following with any of your children, not counting any who live with you?        | Meet up (include both arranged and chance meetings)                                                     | Social Behavior and Activities    |
|                                                                                                                             | Speak on the phone                                                                                      | Social Behavior and Activities    |
|                                                                                                                             | Write or email                                                                                          | Social Behavior and Activities    |
| On average, how often do you do each of the following with any of these family members, not counting any who live with you? | Meet up (include both arranged and chance meetings)                                                     | Social Behavior and Activities    |
|                                                                                                                             | Speak on the phone                                                                                      | Social Behavior and Activities    |
|                                                                                                                             | Write or email                                                                                          | Social Behavior and Activities    |
| On average, how often do you do each of the following with any of your friends, not counting any who live with you?         | Meet up (include both arranged and chance meetings)                                                     | Social Behavior and Activities    |
|                                                                                                                             | Speak on the phone                                                                                      | Social Behavior and Activities    |
|                                                                                                                             | Write or email                                                                                          | Social Behavior and Activities    |
|                                                                                                                             | Yesterday, did you work or volunteer?                                                                   | Social Behavior and Activities    |
|                                                                                                                             | Yesterday, did you socialize with friends, neighbors, or family (not counting your spouse or partner)?  | Social Behavior and Activities    |
|                                                                                                                             | Whether health limits work                                                                              | Social Behavior and Activities    |
|                                                                                                                             | Considers self retired                                                                                  | Social Behavior and Activities    |
|                                                                                                                             | Retirement satisfaction                                                                                 | Social Behavior and Activities    |
|                                                                                                                             | Currently working for pay                                                                               | Social Behavior and Activities    |
|                                                                                                                             | Works second job                                                                                        | Social Behavior and Activities    |
| We would now like to ask you some questions about your PARTNER OR SPOUSE.                                                   | How much do they really understand the way you feel about things?                                       | Fulfillment of Basic Social Needs |
|                                                                                                                             | How much can you rely on them if you have a serious problem?                                            | Social Resources                  |
|                                                                                                                             | How much can you open up to them if you need to talk about your worries?                                | Fulfillment of Basic Social Needs |
|                                                                                                                             | How often do they make too many demands on you?                                                         | Fulfillment of Basic Social Needs |
|                                                                                                                             | How much do they criticize you?                                                                         | Fulfillment of Basic Social Needs |
|                                                                                                                             | How much do they let you down when you are counting on them?                                            | Fulfillment of Basic Social Needs |

| STEM                                                                                                                    | QUESTION                                                                 | DOMAIN                            |
|-------------------------------------------------------------------------------------------------------------------------|--------------------------------------------------------------------------|-----------------------------------|
|                                                                                                                         | How much do they get on your nerves?                                     | Fulfillment of Basic Social Needs |
|                                                                                                                         | How close is your relationship with your partner or spouse?              | Fulfillment of Basic Social Needs |
| Thinking about all of YOUR LIVING CHILDREN, please check the answer which best shows how you feel about each statement. | How much do they really understand the way you feel about things?        | Fulfillment of Basic Social Needs |
|                                                                                                                         | How much can you rely on them if you have a serious problem?             | Fulfillment of Basic Social Needs |
|                                                                                                                         | How much can you open up to them if you need to talk about your worries? | Fulfillment of Basic Social Needs |
|                                                                                                                         | How often do they make too many demands on you?                          | Fulfillment of Basic Social Needs |
|                                                                                                                         | How much do they criticize you?                                          | Fulfillment of Basic Social Needs |
|                                                                                                                         | How much do they let you down when you are counting on them?             | Fulfillment of Basic Social Needs |
|                                                                                                                         | How much do they get on your nerves?                                     | Fulfillment of Basic Social Needs |
| We would now like to ask you some questions about these family members.                                                 | How much do they really understand the way you feel about things?        | Fulfillment of Basic Social Needs |
|                                                                                                                         | How much can you rely on them if you have a serious problem?             | Fulfillment of Basic Social Needs |
|                                                                                                                         | How much can you open up to them if you need to talk about your worries? | Fulfillment of Basic Social Needs |
|                                                                                                                         | How often do they make too many demands on you?                          | Fulfillment of Basic Social Needs |
|                                                                                                                         | How much do they criticize you?                                          | Fulfillment of Basic Social Needs |
|                                                                                                                         | How much do they let you down when you are counting on them?             | Fulfillment of Basic Social Needs |
|                                                                                                                         | How much do they get on your nerves?                                     | Fulfillment of Basic Social Needs |
| We would now like to ask you some questions about YOUR FRIENDS.                                                         | How much do they really understand the way you feel about things?        | Fulfillment of Basic Social Needs |
|                                                                                                                         | How much can you rely on them if you have a serious problem?             | Fulfillment of Basic Social Needs |
|                                                                                                                         | How much can you open up to them if you need to talk about your worries? | Fulfillment of Basic Social Needs |
|                                                                                                                         | How often do they make too many demands on you?                          | Fulfillment of Basic Social Needs |
|                                                                                                                         | How much do they criticize you?                                          | Fulfillment of Basic Social Needs |
|                                                                                                                         | How much do they let you down when you are counting on them?             | Fulfillment of Basic Social Needs |
|                                                                                                                         | How much do they get on your nerves?                                     | Fulfillment of Basic Social Needs |
| The next questions are about how you feel about different aspects of your life.                                         | You lack companionship?                                                  | Fulfillment of Basic Social Needs |
|                                                                                                                         | Left out?                                                                | Fulfillment of Basic Social Needs |
|                                                                                                                         | Isolated from others?                                                    | Fulfillment of Basic Social Needs |
|                                                                                                                         | That you are "in tune" with the people around you?                       | Fulfillment of Basic Social Needs |
|                                                                                                                         | Alone?                                                                   | Fulfillment of Basic Social Needs |
|                                                                                                                         | That there are people you can talk to?                                   | Social Resources                  |

| STEM                                                                                                                                                          | QUESTION                                                                                                                                        | DOMAIN                            |
|---------------------------------------------------------------------------------------------------------------------------------------------------------------|-------------------------------------------------------------------------------------------------------------------------------------------------|-----------------------------------|
|                                                                                                                                                               | That there are people you can turn to?                                                                                                          | Fulfillment of Basic Social Needs |
|                                                                                                                                                               | That there are people who really understand you?                                                                                                | Fulfillment of Basic Social Needs |
|                                                                                                                                                               | That there are people you feel close to?                                                                                                        | Fulfillment of Basic Social Needs |
|                                                                                                                                                               | Part of a group of friends?                                                                                                                     | Fulfillment of Basic Social Needs |
| In your day-to-day life, HOW OFTEN HAVE ANY OF THE FOLLOWING THINGS HAPPENED TO YOU?                                                                          | You are treated with less courtesy or respect than other people.                                                                                | Fulfillment of Basic Social Needs |
|                                                                                                                                                               | You receive poorer service than other people at restaurants or stores.                                                                          | Fulfillment of Basic Social Needs |
|                                                                                                                                                               | People act as if they think you are not smart.                                                                                                  | Fulfillment of Basic Social Needs |
|                                                                                                                                                               | People act as if they are afraid of you.                                                                                                        | Fulfillment of Basic Social Needs |
|                                                                                                                                                               | You are threatened or harassed.                                                                                                                 | Fulfillment of Basic Social Needs |
|                                                                                                                                                               | You receive poorer service or treatment than other people from doctors or hospitals.                                                            | Fulfillment of Basic Social Needs |
| The following statements are about people's expectations of each other. Please tell us how much you agree or disagree with each statement for you personally. | I have always been satisfied with the balance between what I have given my partner and what I have received in return.                          | Fulfillment of Basic Social Needs |
|                                                                                                                                                               | I have always received adequate appreciation for providing help in my family.                                                                   | Fulfillment of Basic Social Needs |
|                                                                                                                                                               | In my current major activity (job, looking after home, voluntary work) I have always been satisfied with the rewards I received for my efforts. | Fulfillment of Basic Social Needs |
|                                                                                                                                                               | Yesterday, did you feel lonely?                                                                                                                 | Fulfillment of Basic Social Needs |

## Appendix 2 Missingness

We used single imputation to address missing values for predictors. Categorical variables were imputed with the mode value and continuous variables were imputed with the median value. Median missingness was 2.6% (IQR 2.0, 3.5) and maximum missingness was 12% for a question asking participants where they are on the societal ladder. Below we detail how missing values are imputed for variables selected in the final model

| Predictor                                                                                          | Missingness in 2010 cohort (development cohort) | Imputed value if missing                                          |
|----------------------------------------------------------------------------------------------------|-------------------------------------------------|-------------------------------------------------------------------|
| Age                                                                                                | 0%                                              | 75 years                                                          |
| Gender                                                                                             | 0%                                              | Woman                                                             |
| Local area is full of rubbish and litter*                                                          | 3.6%                                            | Area is kept very clean                                           |
| Low self-reported control over financial situation**                                               | 2.1%                                            | 4 (0 to 10 scale where 1=no control at all, 10=very much control) |
| Has children and meets with children less than once a year                                         | 3.9%                                            | Meets weekly                                                      |
| Activities with grandchildren, niece/nephews or neighborhood children^^                            | 2.7%                                            | 5 (At least once a month)                                         |
| Not working for pay at the present time                                                            | 0.1%                                            | No working for pay                                                |
| Does no volunteering or charity work                                                               | 3.0%                                            | Does any volunteering or charity work                             |
| Feeling isolated from others                                                                       | 3.0%                                            | Hardly ever or never                                              |
| You are treated with less courtesy or respect than other people (a few times a year or more often) | 2.3%                                            | Less than a few times per year                                    |

### Legend

\* defined as ( $\geq 4$  on 1 to 7 scale where 1=area is kept very clean, 7=area is always full of rubbish and litter)

\*\*defined as ( $\leq 3$  on 0 to 10 scale where 1=no control at all, 10=very much control)

^^grandchildren, neighborhood children, nieces/nephews, on a 1 to 7 scale (1=daily, 7=never/not relevant), continuous

## Appendix 3: TRIPOD CHECKLIST

| Section/Topic                |     | Checklist Item |                                                                                                                                                                                                       | Page                    |
|------------------------------|-----|----------------|-------------------------------------------------------------------------------------------------------------------------------------------------------------------------------------------------------|-------------------------|
| <b>Title and abstract</b>    |     |                |                                                                                                                                                                                                       |                         |
| Title                        | 1   | D;V            | Identify the study as developing and/or validating a multivariable prediction model, the target population, and the outcome to be predicted.                                                          | 1                       |
| Abstract                     | 2   | D;V            | Provide a summary of objectives, study design, setting, participants, sample size, predictors, outcome, statistical analysis, results, and conclusions.                                               | 2,3                     |
| <b>Introduction</b>          |     |                |                                                                                                                                                                                                       |                         |
| Background and objectives    | 3a  | D;V            | Explain the medical context (including whether diagnostic or prognostic) and rationale for developing or validating the multivariable prediction model, including references to existing models.      | 3                       |
|                              | 3b  | D;V            | Specify the objectives, including whether the study describes the development or validation of the model or both.                                                                                     | 4                       |
| <b>Methods</b>               |     |                |                                                                                                                                                                                                       |                         |
| Source of data               | 4a  | D;V            | Describe the study design or source of data (e.g., randomized trial, cohort, or registry data), separately for the development and validation data sets, if applicable.                               | 5                       |
|                              | 4b  | D;V            | Specify the key study dates, including start of accrual; end of accrual; and, if applicable, end of follow-up.                                                                                        | 5                       |
| Participants                 | 5a  | D;V            | Specify key elements of the study setting (e.g., primary care, secondary care, general population) including number and location of centres.                                                          | 5                       |
|                              | 5b  | D;V            | Describe eligibility criteria for participants.                                                                                                                                                       | 5                       |
|                              | 5c  | D;V            | Give details of treatments received, if relevant.                                                                                                                                                     | n/a                     |
| Outcome                      | 6a  | D;V            | Clearly define the outcome that is predicted by the prediction model, including how and when assessed.                                                                                                | 6                       |
|                              | 6b  | D;V            | Report any actions to blind assessment of the outcome to be predicted.                                                                                                                                | n/a                     |
| Predictors                   | 7a  | D;V            | Clearly define all predictors used in developing or validating the multivariable prediction model, including how and when they were measured.                                                         | 6, 7                    |
|                              | 7b  | D;V            | Report any actions to blind assessment of predictors for the outcome and other predictors.                                                                                                            | n/a                     |
| Sample size                  | 8   | D;V            | Explain how the study size was arrived at.                                                                                                                                                            | Appendix 4              |
| Missing data                 | 9   | D;V            | Describe how missing data were handled (e.g., complete-case analysis, single imputation, multiple imputation) with details of any imputation method.                                                  | 6                       |
| Statistical analysis methods | 10a | D              | Describe how predictors were handled in the analyses.                                                                                                                                                 | 5, 6                    |
|                              | 10b | D              | Specify type of model, all model-building procedures (including any predictor selection), and method for internal validation.                                                                         | 6                       |
|                              | 10c | V              | For validation, describe how the predictions were calculated.                                                                                                                                         | 6                       |
|                              | 10d | D;V            | Specify all measures used to assess model performance and, if relevant, to compare multiple models.                                                                                                   | 6                       |
|                              | 10e | V              | Describe any model updating (e.g., recalibration) arising from the validation, if done.                                                                                                               | n/a                     |
| Risk groups                  | 11  | D;V            | Provide details on how risk groups were created, if done.                                                                                                                                             | 6                       |
| Development vs. validation   | 12  | V              | For validation, identify any differences from the development data in setting, eligibility criteria, outcome, and predictors.                                                                         | 5, Table 1, Table 2     |
| <b>Results</b>               |     |                |                                                                                                                                                                                                       |                         |
| Participants                 | 13a | D;V            | Describe the flow of participants through the study, including the number of participants with and without the outcome and, if applicable, a summary of the follow-up time. A diagram may be helpful. | Appendix 4              |
|                              | 13b | D;V            | Describe the characteristics of the participants (basic demographics, clinical features, available predictors), including the number of participants with missing data for predictors and outcome.    | Table 1 & 2; Appendix 4 |
|                              | 13c | V              | For validation, show a comparison with the development data of the distribution of important variables (demographics, predictors and outcome).                                                        | Table 1, 2              |
| Model development            | 14a | D              | Specify the number of participants and outcome events in each analysis.                                                                                                                               | Page 7                  |
|                              | 14b | D              | If done, report the unadjusted association between each candidate predictor and outcome.                                                                                                              | n/a                     |
| Model specification          | 15a | D              | Present the full prediction model to allow predictions for individuals (i.e., all regression coefficients, and model intercept or baseline survival at a given time point).                           | Table 3                 |
|                              | 15b | D              | Explain how to use the prediction model.                                                                                                                                                              | Figure 2                |
| Model performance            | 16  | D;V            | Report performance measures (with CIs) for the prediction model.                                                                                                                                      | 8,9                     |
| Model-updating               | 17  | V              | If done, report the results from any model updating (i.e., model specification, model performance).                                                                                                   | n/a                     |
| <b>Discussion</b>            |     |                |                                                                                                                                                                                                       |                         |
| Limitations                  | 18  | D;V            | Discuss any limitations of the study (such as nonrepresentative sample, few events per predictor, missing data).                                                                                      | 13                      |
| Interpretation               | 19a | V              | For validation, discuss the results with reference to performance in the development data, and any other validation data.                                                                             | n/a                     |
|                              | 19b | D;V            | Give an overall interpretation of the results, considering objectives, limitations, results from similar studies, and other relevant evidence.                                                        | 11                      |
| Implications                 | 20  | D;V            | Discuss the potential clinical use of the model and implications for future research.                                                                                                                 | 11,12                   |
| <b>Other information</b>     |     |                |                                                                                                                                                                                                       |                         |

|                           |    |     |                                                                                                                               |                 |
|---------------------------|----|-----|-------------------------------------------------------------------------------------------------------------------------------|-----------------|
| Supplementary information | 21 | D;V | Provide information about the availability of supplementary resources, such as study protocol, Web calculator, and data sets. | Acknowledgement |
| Funding                   | 22 | D;V | Give the source of funding and the role of the funders for the present study.                                                 | 14              |

## Appendix 4: Cohort flow table

|                                                                                                       | Development cohort<br>(Baseline interview<br>2010-2011) | Validation cohort<br>(Baseline interview<br>2012-2013) |
|-------------------------------------------------------------------------------------------------------|---------------------------------------------------------|--------------------------------------------------------|
| <b>Eligible for Psychosocial and Lifestyle Questionnaire and age <math>\geq 65</math> yrs</b>         | <b>5384</b>                                             | <b>4997</b>                                            |
| Excluded: did not complete Psychosocial and Lifestyle Questionnaire                                   | 1082                                                    | 1049                                                   |
| <b>Baseline cohort, cohort size for death analysis (A)</b>                                            | <b>4302</b>                                             | <b>3948</b>                                            |
| Excluded: ADL dependent at baseline (B1)                                                              |                                                         | 383                                                    |
| Excluded: Missing ADL data in either or both follow up interviews or exit interview if deceased (B2)  |                                                         | 279                                                    |
| <b>Cohort size for ADL analysis (A – B1 – B2)</b>                                                     |                                                         | <b>3286</b>                                            |
| Excluded: Living in NH at baseline (C1)                                                               |                                                         | 85                                                     |
| Excluded: Missing NH status in either or both follow up interviews or exit interview if deceased (C2) |                                                         | 394                                                    |
| <b>Cohort size for NH analysis (A – C1 – C2)</b>                                                      |                                                         | <b>3469</b>                                            |
| Excluded: Missing hospital stay data in either follow up interview or exit interview if deceased (D)  |                                                         | 542                                                    |
| <b>Cohort size for hospitalization analysis (A – D)</b>                                               |                                                         | <b>3406</b>                                            |
| Excluded: Does not have Medicare claims linkage (E1)                                                  |                                                         | 290                                                    |
| Excluded: Does not have 12 months of part A, B and FFS before baseline interview (E2)                 |                                                         | 1722                                                   |
| <b>Cohort size for Charlson score (A – E1 – E2)</b>                                                   |                                                         | <b>2226</b>                                            |

### Legend

ADL – activity of daily living

NH – nursing home

Exit interviews are interviews completed with next of kin if the study participant dies before the next scheduled interview

## Appendix 5: Model interaction with Race

Race was one of the 183 candidate predictors but was not selected through LASSO the variable selection procedure detailed in the Methods section. Race requires special attention because of the substantial effect of racism on health. We conducted a sensitivity analysis where added race by predictor interactions to see if doing so improved the model Bayesian Information Criteria (BIC). The results below show that model BIC did not improve in any of the permutations where race was added. Based on these results, we did not add race to the model.

| Model                                                                                                             | BIC<br>(lower is better) |
|-------------------------------------------------------------------------------------------------------------------|--------------------------|
| Model as developed in the main analysis (i.e., base model)                                                        | 3922                     |
| Base model +<br>Race x Activities with grandchildren, niece/nephews or neighborhood children <sup>^</sup>         | 3938                     |
| Base model +<br>Race x Feeling isolated from others (some of the time vs. hardly ever or never)                   | 3943                     |
| Base model +<br>Race x Does no volunteering or charity work                                                       | 3945                     |
| Base model +<br>Race x Local area is full of rubbish and litter*                                                  | 3945                     |
| Base model +<br>Race x Low self-reported control over financial situation**                                       | 3945                     |
| Base model +<br>Race x Treated with less courtesy or respect than other people (a few times a year or more often) | 3941                     |
| Base model +<br>Race x Has and meets with children less than once a year                                          | 3946                     |
| Base model +<br>Race x Not working for pay at the present time                                                    | 3938                     |

### Legend

each interaction model includes race as a main effect as well

\* defined as ( $\geq 4$  on 1 to 7 scale where 1=area is kept very clean, 7=area is always full of rubbish and litter)

\*\*defined as ( $\leq 3$  on 0 to 10 scale where 1=no control at all, 10=very much control)

<sup>^</sup>grandchildren, neighborhood children, nieces/nephews, on a 1 to 7 scale (1=daily, 7=never/not relevant), continuous

## Appendix 6: Improvement in Discrimination

In the main analysis we present the improvement in risk stratification (Figure 3 and 4). We also examined whether the Social Frailty Index improved the discrimination of the Charlson Index and the Lee Index. In both cases we find a small, statistically significant improvement in discrimination when the Social Frailty Index is added.

| <b>Model</b>                          | <b>AUC (95% CI)</b>  |
|---------------------------------------|----------------------|
| Social Frailty Index                  | 0.73 (0.72 - 0.75)   |
| Lee Score                             | 0.79 (0.77 - 0.80)   |
| Social Frailty Index + Lee Score      | 0.80 (0.78 - 0.81)*  |
| Charlson Score                        | 0.77 (0.75 - 0.80)   |
| Social Frailty Index + Charlson Score | 0.78 (0.76 - 0.80)** |

\* the AUC is statistically greater for Social Frailty Index + Lee Score when compared to Lee score alone (p<0.001)

\*\* the AUC is statistically greater for Social Frailty Index + Charlson Score when compared to Charlson Score alone (p=0.006)

## Appendix 7: Tabular results of Figure 3 and Figure 4

### A. Charlson score by Social Frailty Index tertiles

| Tertile of<br>Charlson<br>Score | Tertile of<br>Social<br>Frailty Index | N   | Deaths | Death<br>rate | Lower<br>limit | Upper<br>limit | Proportion<br>of cohort |
|---------------------------------|---------------------------------------|-----|--------|---------------|----------------|----------------|-------------------------|
| 1                               | 1                                     | 324 | 27     | 0.08          | 0.05           | 0.11           | 0.15                    |
| 1                               | 2                                     | 243 | 30     | 0.12          | 0.08           | 0.16           | 0.11                    |
| 1                               | 3                                     | 175 | 47     | 0.27          | 0.20           | 0.33           | 0.08                    |
| 2                               | 1                                     | 252 | 36     | 0.14          | 0.10           | 0.19           | 0.11                    |
| 2                               | 2                                     | 257 | 46     | 0.18          | 0.13           | 0.23           | 0.12                    |
| 2                               | 3                                     | 233 | 64     | 0.27          | 0.22           | 0.33           | 0.10                    |
| 3                               | 1                                     | 169 | 50     | 0.30          | 0.23           | 0.36           | 0.08                    |
| 3                               | 2                                     | 244 | 99     | 0.41          | 0.34           | 0.47           | 0.11                    |
| 3                               | 3                                     | 329 | 153    | 0.47          | 0.41           | 0.52           | 0.15                    |

| Tertile of<br>Charlson<br>Score | Tertile of<br>Social<br>Frailty Index<br>(ref) | Tertile of<br>Social Frailty<br>Index<br>(Comparison) | P value | Annotation<br>in Figure 3 |
|---------------------------------|------------------------------------------------|-------------------------------------------------------|---------|---------------------------|
| 1                               | 1                                              | 2                                                     | 0.152   | NS                        |
| 1                               | 2                                              | 3                                                     | <0.001  | ***                       |
| 1                               | 1                                              | 3                                                     | <0.001  | ***                       |
| 2                               | 1                                              | 2                                                     | 0.323   | NS                        |
| 2                               | 2                                              | 3                                                     | 0.015   | *                         |
| 2                               | 1                                              | 3                                                     | <0.001  | ***                       |
| 3                               | 1                                              | 2                                                     | 0.029   | *                         |
| 3                               | 2                                              | 3                                                     | 0.184   | NS                        |
| 3                               | 1                                              | 3                                                     | <0.001  | ***                       |

## B. Lee score by Social Frailty Index tertiles

| Tertile of Lee Score | Tertile of Social Frailty Index | N   | Deaths | Death rate | Lower limit | Upper limit | Proportion of cohort |
|----------------------|---------------------------------|-----|--------|------------|-------------|-------------|----------------------|
| 1                    | 1                               | 819 | 38     | 0.05       | 0.03        | 0.06        | 0.21                 |
| 1                    | 2                               | 408 | 28     | 0.07       | 0.04        | 0.09        | 0.10                 |
| 1                    | 3                               | 89  | 8      | 0.09       | 0.03        | 0.15        | 0.02                 |
| 2                    | 1                               | 377 | 43     | 0.11       | 0.08        | 0.15        | 0.10                 |
| 2                    | 2                               | 552 | 93     | 0.17       | 0.14        | 0.20        | 0.14                 |
| 2                    | 3                               | 387 | 86     | 0.22       | 0.18        | 0.26        | 0.10                 |
| 3                    | 1                               | 120 | 35     | 0.29       | 0.21        | 0.37        | 0.03                 |
| 3                    | 2                               | 819 | 38     | 0.05       | 0.03        | 0.06        | 0.21                 |
| 3                    | 3                               | 408 | 28     | 0.07       | 0.04        | 0.09        | 0.10                 |

| Tertile of Lee Score | Tertile of Social Frailty Index (ref) | Tertile of Social Frailty Index (Comparison) | P value | Annotation in Figure 4 |
|----------------------|---------------------------------------|----------------------------------------------|---------|------------------------|
| 1                    | 1                                     | 2                                            | 0.136   | NS                     |
| 1                    | 2                                     | 3                                            | 0.635   | NS                     |
| 1                    | 1                                     | 3                                            | 0.128   | NS                     |
| 2                    | 1                                     | 2                                            | 0.027   | *                      |
| 2                    | 2                                     | 3                                            | 0.048   | *                      |
| 2                    | 1                                     | 3                                            | <0.001  | ***                    |
| 3                    | 1                                     | 2                                            | 0.389   | NS                     |
| 3                    | 2                                     | 3                                            | <0.001  | ***                    |
| 3                    | 1                                     | 3                                            | <0.001  | ***                    |
